# Supplementary material for: Effects of Fasting versus Non-Fasting on Emetic Complications in Radiological Examinations Using Intravascular Non-Ionic Iodinated Contrast Media: A Systematic Review and Meta-Analysis
Source: PubMed Central journal article supplement — Korean J Radiol. 2023 Sep 20;24(10):996–1005. doi: 10.3348/kjr.2023.0399 (PMC10550746; doi:10.3348/kjr.2023.0399), 2023-09-20
Supplement: kjr-24-996-s001.pdf [file kjr-24-996-s001.pdf]

## SUPPLEMENTS

**Supplementary Table 1.** The fasting and non-fasting protocol of each study

| Studies             | Fasting                                                                                 | Non-fasting                                                        |
|---------------------|-----------------------------------------------------------------------------------------|--------------------------------------------------------------------|
| Liu et al. [1]      | At least 4 hours of fasting from solid food<br>No water restriction                     | No restriction                                                     |
| Neeman et al. [2]   | At least 4 hours of fasting from both fluids and solid food                             | No restriction                                                     |
| Tsushima et al. [3] | At least 4 hours of fasting from solid food<br>No water restriction                     | No restriction                                                     |
| Ha et al. [4]       | At least 4 hours of fasting from solid food<br>No water restriction                     | Less than 4 hours of fasting from solid food                       |
| Barbosa et al. [5]  | At least 4 hours of fasting from solid food                                             | Received light meal within 1 hour before<br>administration of ICM  |
| Li et al. [6]       | At least 4 hours of fasting from solid food<br>No water restriction                     | No restriction                                                     |
| Hamid et al. [7]*   | -                                                                                       | No restriction                                                     |
| Kwon et al. [8]     | At least 6 hours of fasting from both fluids and solid food                             | Normal diet as usual<br>Neither restriction nor encourage          |
| Kim et al. [9]      | At least 6 hours of fasting from solid food and at least 1 hour<br>of fluid restriction | Fluid administration within 1 hour before<br>administration of ICM |
| Park et al. [10]    | At least 6 hours of fasting from solid food                                             | Less than 6 hours of fasting                                       |

\*All study participants were non-fasting.

ICM = iodinated contrast media

**Supplementary Table 2.** Quality assessments of included studies using the Newcastle-Ottawa Quality Scale

| Studies             | Selection                                |                                     |                                      |                                                                          | Comparability                                                   | Outcome                |                                                      |                                  | Total score |
|---------------------|------------------------------------------|-------------------------------------|--------------------------------------|--------------------------------------------------------------------------|-----------------------------------------------------------------|------------------------|------------------------------------------------------|----------------------------------|-------------|
|                     | Representativeness of the exposed cohort | Selection of the non-exposed cohort | Ascertainment of exposure to implant | Demonstration that outcome of interest was not present at start of study | Comparability of cohorts on the basis of the design or analysis | Assessment of outcomes | Was the follow-up long enough for outcomes to occur* | Adequacy of follow-up of cohorts |             |
| Liu et al. [1]      | 1                                        | 1                                   | 1                                    |                                                                          | 2 <sup>†</sup>                                                  | 1                      | 1                                                    | 1                                | 8           |
| Neeman et al. [2]   | 1                                        | 1                                   | 1                                    |                                                                          | 1                                                               | 1                      | 1                                                    | 1                                | 7           |
| Tsushima et al. [3] | 1                                        | 1                                   |                                      |                                                                          | 1                                                               | 1                      |                                                      |                                  | 4           |
| Ha et al. [4]       | 1                                        | 1                                   | 1                                    |                                                                          | 2 <sup>†</sup>                                                  | 1                      | 1                                                    | 1                                | 8           |
| Barbosa et al. [5]  | 1                                        | 1                                   | 1                                    | 1                                                                        | 1                                                               | 1                      |                                                      | 1                                | 7           |
| Li et al. [6]       | 1                                        | 1                                   | 1                                    |                                                                          | 2 <sup>†</sup>                                                  | 1                      |                                                      | 1                                | 7           |
| Hamid et al. [7]    | 1                                        |                                     |                                      |                                                                          |                                                                 | 1                      |                                                      | 1                                | 3           |
| Kwon et al. [8]     | 1                                        | 1                                   |                                      |                                                                          | 2 <sup>†</sup>                                                  | 1                      |                                                      | 1                                | 6           |
| Kim et al. [9]      | 1                                        | 1                                   | 1                                    | 1                                                                        | 2 <sup>†</sup>                                                  | 1                      |                                                      | 1                                | 8           |
| Park et al. [10]    | 1                                        | 1                                   |                                      | 1                                                                        | 1                                                               | 1                      |                                                      | 1                                | 6           |

\*The follow-up period was deemed to be sufficient for aspiration pneumonia (at least 96 hours after intravascular contrast medium administration), '2' is allotted when two conditions are satisfied; 1) matching of cases and controls in the design and 2) adjustment for confounders in the analysis [11].

## REFERENCES

1. Liu H, Zhao L, Liu J, Lan F, Cai L, Fang J, et al. Change the preprocedural fasting policy for contrast-enhanced CT: results of 127,200 cases. *Insights Imaging* 2022;13:29
2. Neeman Z, Abu Ata M, Touma E, Saliba W, Barnett-Griness O, Gralnek IM, et al. Is fasting still necessary prior to contrast-enhanced computed tomography? A randomized clinical study. *Eur Radiol* 2021;31:1451-1459
3. Tsushima Y, Seki Y, Nakajima T, Hirasawa H, Taketomi-Takahashi A, Tan S, et al. The effect of abolishing instructions to fast prior to contrast-enhanced CT on the incidence of acute adverse reactions. *Insights Imaging* 2020;11:113
4. Ha JY, Choi YH, Cho YJ, Lee S, Lee SB, Choi G, et al. Incidence and risk factors of nausea and vomiting after exposure to low-osmolality iodinated contrast media in children: a focus on preparative fasting. *Korean J Radiol* 2020;21:1178-1186
5. Barbosa PNVP, Bitencourt AGV, Tyng CJ, Cunha R, Travesso DJ, Almeida MFA, et al. Preparative fasting for contrast-enhanced CT in a cancer center: a new approach. *AJR Am J Roentgenol* 2018;210:941-947
6. Li X, Liu H, Zhao L, Liu J, Cai L, Zhang L, et al. The effect of preparative solid food status on the occurrence of nausea, vomiting and aspiration symptoms in enhanced CT examination: prospective observational study. *Br J Radiol* 2018;91:20180198
7. Hamid T, Aleem Q, Lau Y, Singh R, McDonald J, Macdonald JE, et al. Pre-procedural fasting for coronary interventions: is it time to change practice? *Heart* 2014;100:658-661
8. Kwon OK, Oh CW, Park H, Bang JS, Bae HJ, Han MK, et al. Is fasting necessary for elective cerebral angiography? *AJNR Am J Neuroradiol* 2011;32:908-910
9. Kim YS, Yoon SH, Choi YH, Park CM, Lee W, Goo JM. Nausea and vomiting after exposure to non-ionic contrast media: incidence and risk factors focusing on preparatory fasting. *Br J Radiol* 2018;91:20180107
10. Park JH, Rhee JE, Kim KS, Shin JH. Is the six-hour fasting before abdominal computed tomography necessary to prevent gastrointestinal adverse events in patients with abdominal pain? *J Korean Soc Emerg Med* 2008;19:333-338
11. Wells GA, Shea B, O'Connell D, Peterson J, Welch V, Losos M, et al. The Newcastle-Ottawa Scale (NOS) for assessing the quality of nonrandomised studies in meta-analyses [accessed on April 10, 2023]. Available at: [https://www.ohri.ca/programs/clinical\\_epidemiology/oxford.asp](https://www.ohri.ca/programs/clinical_epidemiology/oxford.asp)
